# Supplementary material
Source: publisher figshare collection journal article supplement (https://brill.figshare.com/ndownloader/files/27340967)
Supplement: Supplementary file 1 [file 27340967]

**For an Archaeology of Religious Identity in Adulis (Eritrea) and the  
Horn of Africa: Sources, Architecture, and Recent Archaeological  
Excavations**

*Gabriele Castiglia* | ORCID: 0000-0002-1958-294X

Corresponding author; Pontificio Istituto di Archeologia Cristiana, Via Napoleone III, 1  
00185 Rome, Italy

*castiglia@piac.it*

*Philippe Pergola*

Pontificio Istituto di Archeologia Cristiana, Via Napoleone III, 1 00185 Rome, Italy

*pergola@piac.it*

*Marco Ciliberti*

Pontificio Istituto di Archeologia Cristiana, Via Napoleone III, 1 00185 Rome, Italy

*marco.ciliberti86@gmail.com*

*Božana Maletić* | ORCID: 0000-0002-9801-0818

Pontificio Istituto di Archeologia Cristiana, Via Napoleone III, 1 00185 Rome, Italy

*bozanamaletic@gmail.com*

*Matteo Pola* | ORCID: 0000-0003-1265-8400

Pontificio Istituto di Archeologia Cristiana, Via Napoleone III, 1 00185 Rome, Italy

*matteopola87@gmail.com*

*Omar Larentis* | ORCID: 0000-0001-9633-0669

Dipartimento di Medicina e Chirurgia, Università degli Studi dell'Insubria, Via Ravasi 2,

21100 Varese, Italy

*olarentis@uninsubria.it*

### **Supplementary material**

FIGURE S1 Harris-Matrix of the whole excavation, divided in phase

BY G. CASTIGLIA

**PHASE I:** **6001** quadrangular pillar for the apse-north; **6002** apse of the church; **6004** quadrangular pillar for the apse-south; **6005** wall E-W delimiting the central nave-south; **6006** wall N-S delimiting the *pastophorion*-western part; **6007** wall E-W delimiting the central nave-north; **6017** northern wall of the church; **6019** base for the altar; **6020** threshold of the church-entrance; **6026** façade of the church; **6027** wall for the foundation of the threshold; **6033** eastern wall of the church; **6059** southern wall of the church; **6065** floor in *opus signinum* (waterproof mortar) in the S-W room of the church (Room B); **6066** western wall of Room B; **6068** northern wall of the Room B; **6070** southern wall of the Room B; **6072** wall N-S in the external part of the church(Room C); **6078** layer of schist slabs in the external western external part of the church

(rest of an external floor); **6081** southern wall of Room C; **6082** northern wall of the narthex; **6085** northern wall of the northern *pastophorion*; **6086** southern wall of the northern *pastophorion*.

**PHASE II:** **6008** delimitation of the presbyter; **6018** abandonment layer of the presbyter; **6023** filling of clear cut in SU 6028; **6028** clear cut in SU 6029; **6029** layer of stones in the presbyter; **6031** quadrangular structure connected to the presbyter; **6032** mortar layer in the central nave-rest of the preparation of the pavement?; **6071** wall W-E connecting to the façade of the church, in its western external part; **6073** quadrangular structure inside Room C; **6080** layer of schist slabs (pavement) inside Room C.

**PHASE III:** **6011** abandonment layer of the northern *pastophorion*; **6021** collapse in the northern nave; **6022** stone preparation (for a second floor?) inside the northern nave; **6025** collapse with massive pillars in the north-western part of the church; **6058** layer of sand covering the pavement of the baptistery; **6067** collapse of schists and basalts in the Room B; **6069** layer of sand and mortar inside Room B; **6074** layer of schist slabs and sand inside Room C; **6076** collapse, mostly in basalts, inside Room B; **6077** collapse, mostly in schist slabs, inside Room B.

**PHASE IV:** **6024** N-S wall in the northern nave; **6030** collapse in the central nave; **6034** wall E-W connecting to the external eastern part of the church-north; **6035** wall E-W connecting to the external eastern part of the church-south; **6060** N-S wall in the southern nave; **6062** N-S wall in the southern nave; **6083** N-S wall in the northern nave; **T1** tomb; **T2** tomb.

**PHASE V:** **6009** collapse in the northern nave; **6012** collapse in the northern nave; **6063** layer of sand in the central part of the southern nave.
